# Supplementary material
Source: PubMed Central journal article supplement (PMC10575855)
Supplement: 41416_2023_2396_MOESM1_ESM.pdf [file 41416_2023_2396_MOESM1_ESM.pdf]

## **Supplementary Data**

### **Supplementary Figure Legends**

#### **Figure S1. Representative images of aggregation of lymphocytes and a germinal center.**

##### **Clinical significance of localization of TLSs.**

A) Representative images of CD3 and CD20 immunohistostaining ( $\times 40$ ). Scale bars, 100  $\mu\text{m}$ .

B) Representative images of a germinal center ( $\times 40$ ). The inset shows a higher magnification image of the boxed area ( $\times 400$ ). Scale bars, 100  $\mu\text{m}$ . Centroblasts (red arrowheads), centrocytes (blue arrowheads), FDCs (black arrowheads) and HEV (yellow dotted line).

C) Representative images of peritumoral TLSs (peri) and intratumoral TLSs (intra) ( $\times 40$ ). Scale bars, 100  $\mu\text{m}$ .

D) Kaplan–Meier analyses of recurrence-free survival and overall survival in ESCC by localization of TLSs. *P*-values were calculated by log-rank test.

#### **Figure S2. Identification of cell types in ESCC by scRNA-seq.**

A) Schematic overview of the experimental workflow.

B) UMAP plots colored by initial cluster.

C) UMAP plot showed the major cell types using canonical marker genes.

D) Heatmap showed the expression of the canonical marker genes in each major cell type.

E) Numbers of cells from each patient for cell types.

F) Box and whisker plots showed the cluster cell distributions in accordance with histological types (normal tissues (Normal), tumors without TLSs (TLS-) and tumors with TLSs (TLS+)).

Box middle lines, median; box limits, upper and lower quartiles; box whiskers,  $1.5 \times$  the

interquartile range. Dunn's multiple comparisons test was performed.  $^{**}p < 0.01$ .

#### **Figure S3. Trajectory analysis in CD8<sup>+</sup> T cell subtypes.**

Trajectory analysis of CD8<sup>+</sup> T cells. The pseudotime trajectory was calculated with lighter colors indicating newer values.

26 **Figure S4. Phenotypes in myeloid cells. Representative images of CD11c immunostaining.**

27 A) UMAPs of myeloid cells, colored by signature scores of the DC-like, MDSC-like and TAM-  
28 like myeloid subsets.

29 B) Representative images of CD11c immunostaining in tumor tissues with or without TLS  
30 ( $\times 400$ ). Scale bars, 50  $\mu\text{m}$ .

31 **Figure S5. Schematic view showing that SEMA4D on T cells stimulates DCs.**

32 **Figure S6. Schematic view showing that TLSs correlate with enhancement of anti-tumor**  
33 **immunity in ESCC.**

34 **Supplementary Table Legends.**

35 **Supplementary Table S1. Clinicopathological characteristics in patients of esophageal**

36 **squamous cell carcinoma with and without TLS presence.**

37 **Supplementary Table S2. Primary antibody with CODEX.**

38 **Supplementary Table S3. Univariate and multivariate analyses of RFS and OS between**

39 **TLS presence and clinicopathological characteristics in ESCC patients.**

40 **Supplementary Table S4. Summary of patient characteristics used in scRNA-seq in this**

41 **study.**

42 **Supplementary Table S5. Components of each gene signature in our study.**

**Fig. S1**

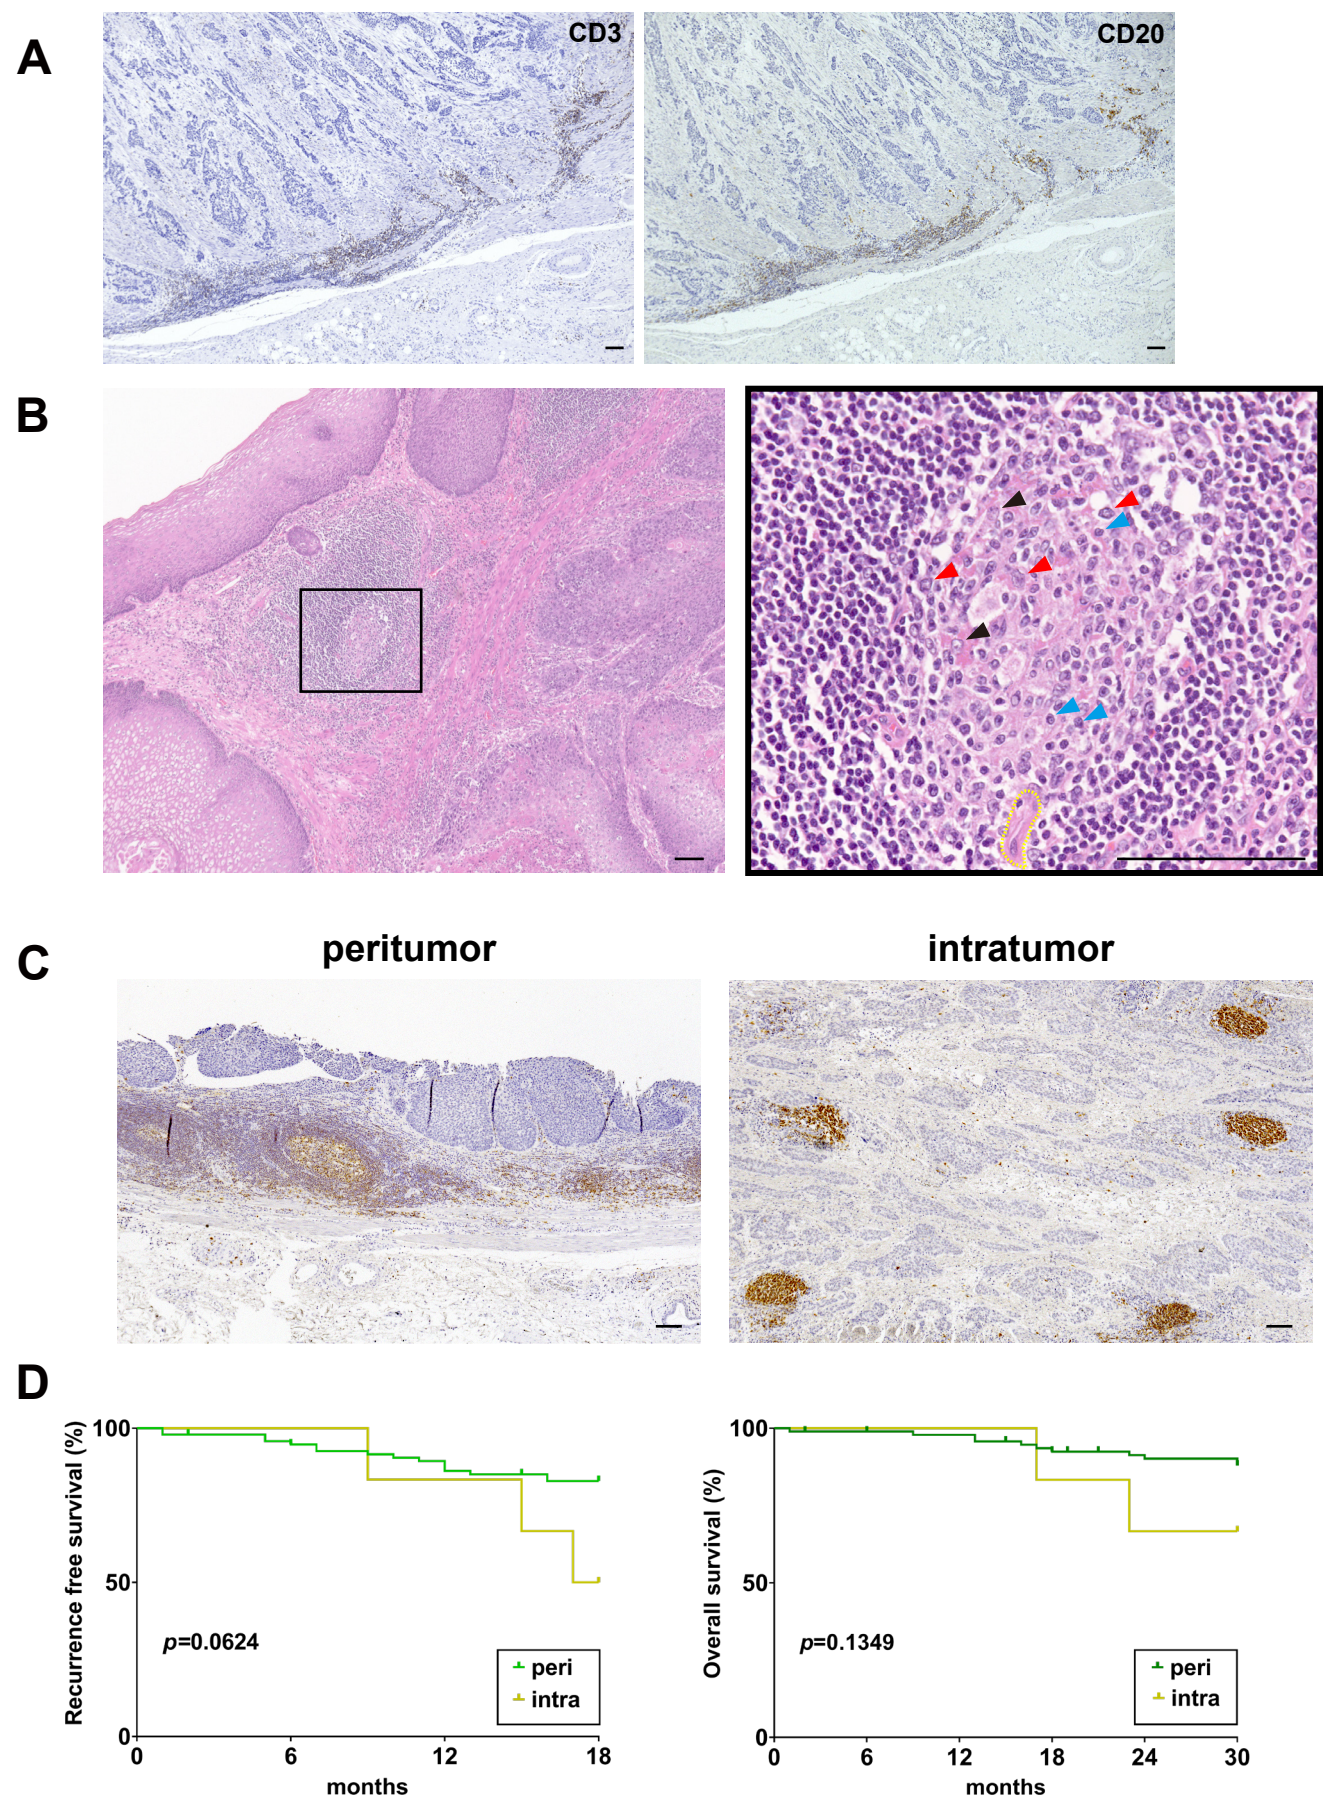

**Fig. S2**

**A**

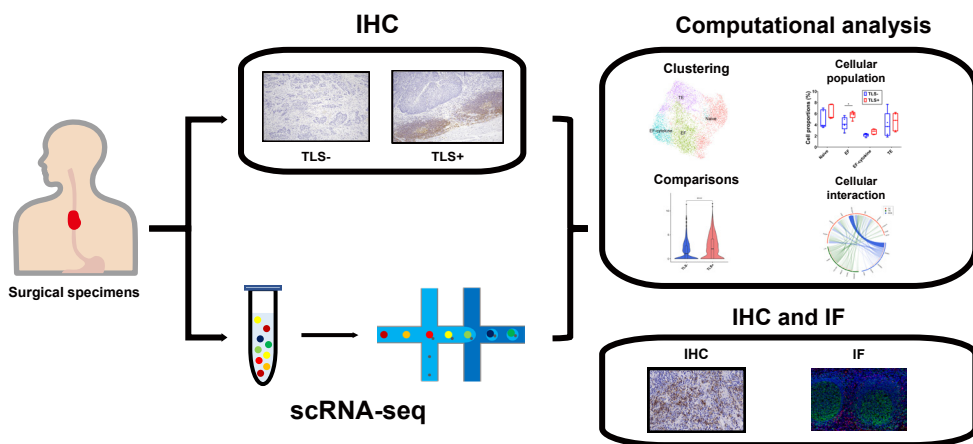

**B**

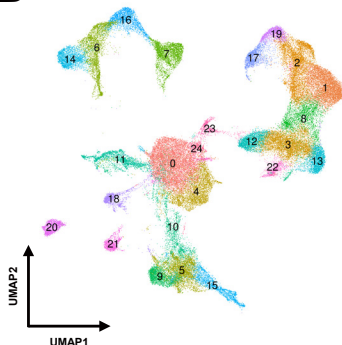

**C**

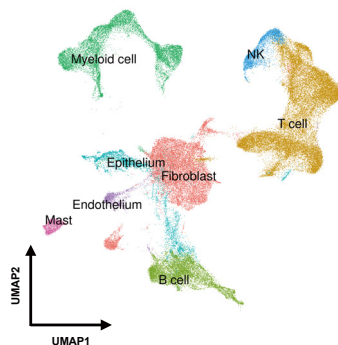

**D**

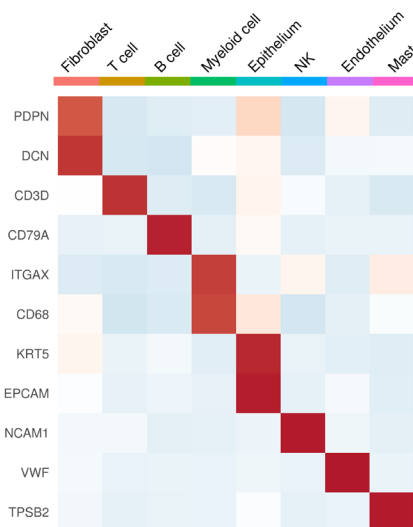

**E**

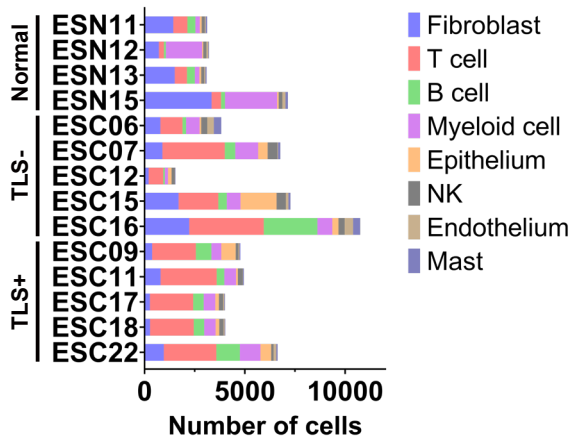

**F**

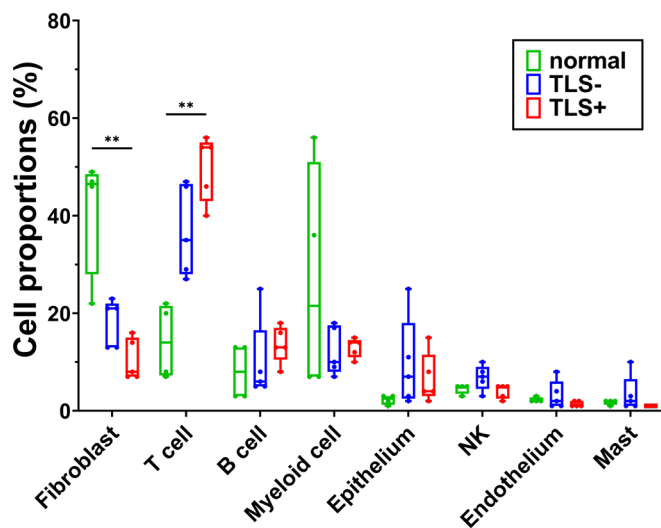

**Fig. S3**

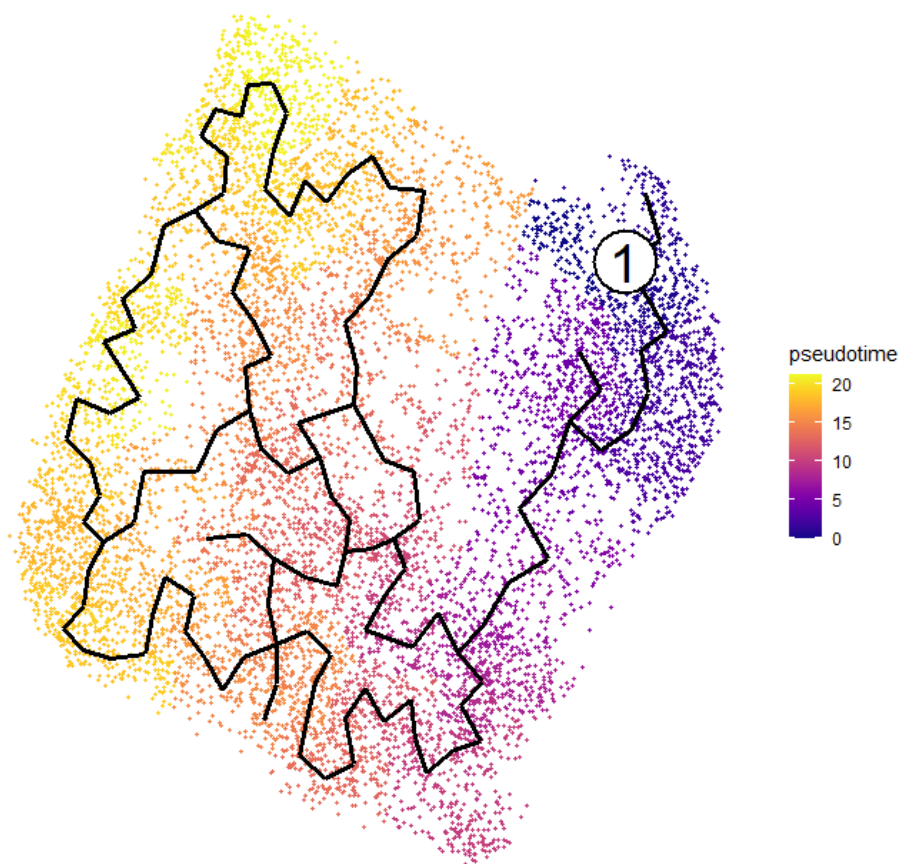

**Fig. S4**

**A**

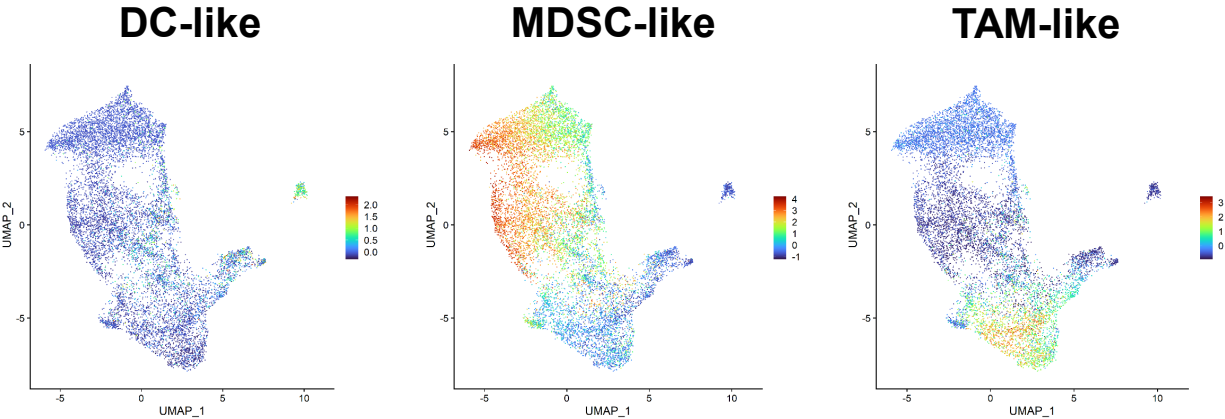

**B**

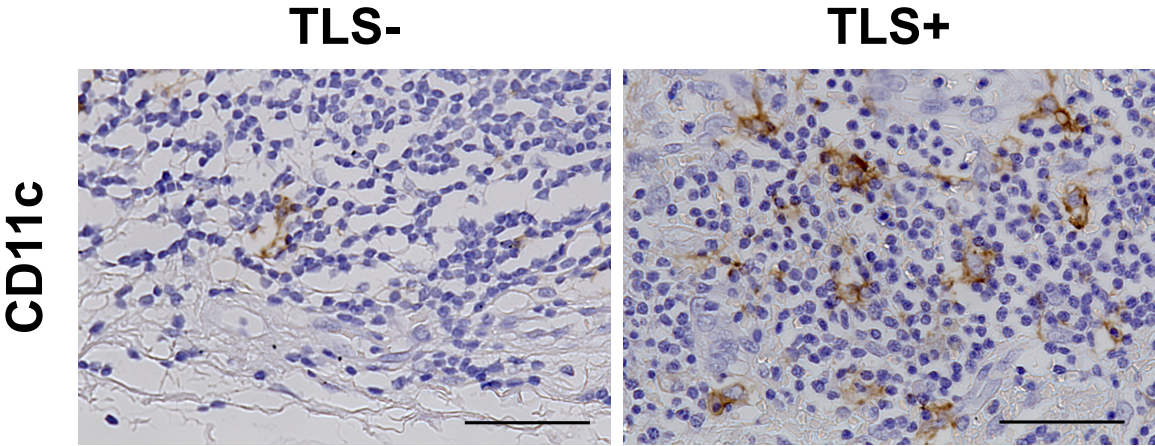

**Fig. S5**

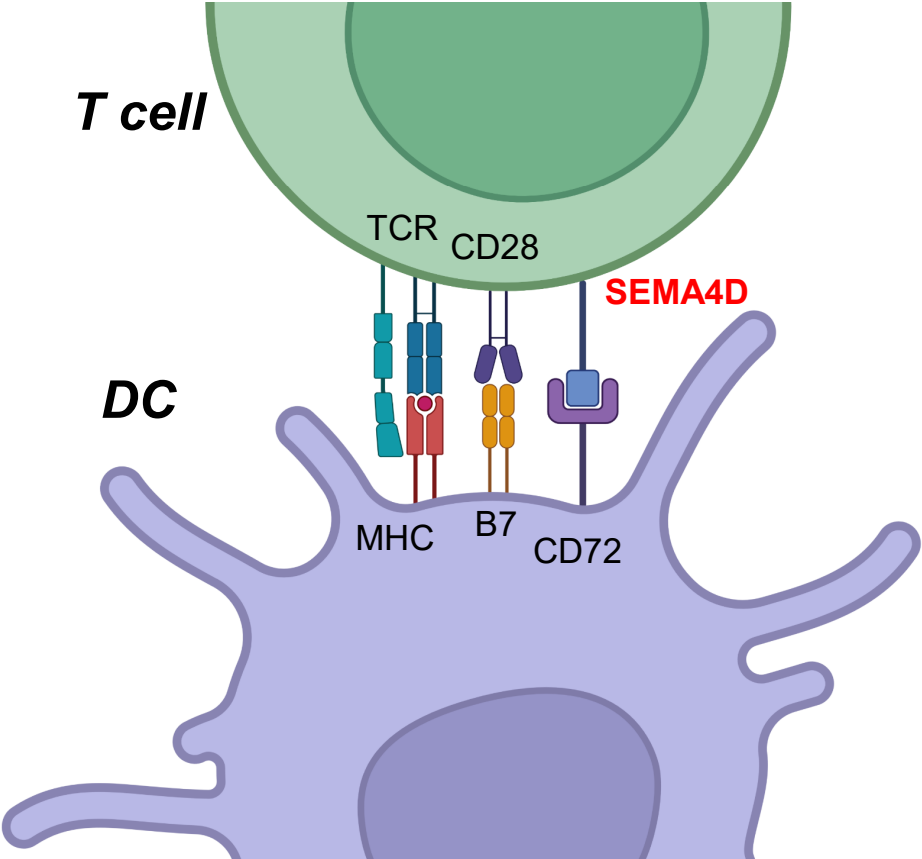

Fig. S6

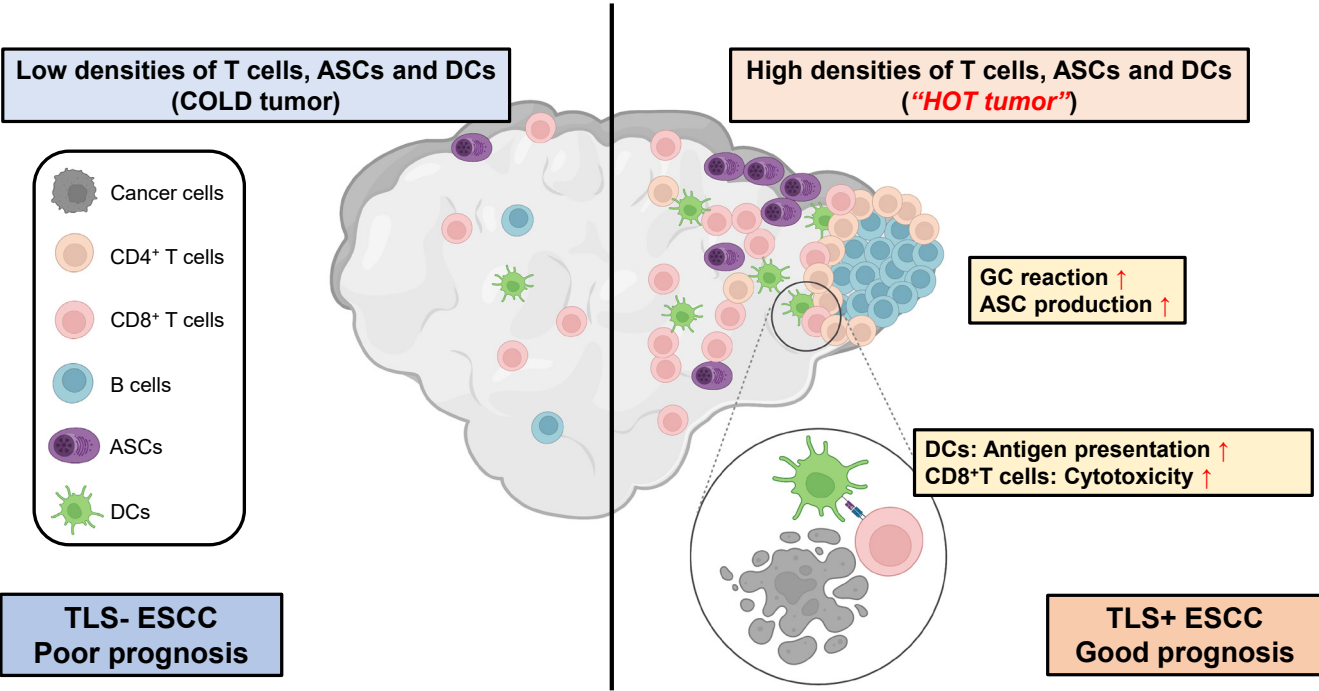

Supplementary Table S1. Clinicopathological characteristics in patients of esophageal squamous cell carcinoma with and without TLS presence.

|                                              | TLS+       | TLS-      | <i>p</i> <sup>a</sup> |
|----------------------------------------------|------------|-----------|-----------------------|
|                                              | No. (%)    |           |                       |
| Characteristics                              | 180        | 144       | 36                    |
| Sex                                          |            |           | 0.795                 |
| Male                                         | 123 (85.4) | 30 (83.3) |                       |
| Female                                       | 21 (14.6)  | 6 (16.7)  |                       |
| Age at surgery                               |            |           | 0.877                 |
| <63 <sup>b</sup>                             | 54 (37.5)  | 13 (36.1) |                       |
| ≥63                                          | 90 (62.5)  | 23 (36.9) |                       |
| pT stage <sup>c</sup>                        |            |           | <b>0.0196</b>         |
| T1/T2                                        | 105 (72.9) | 19 (52.8) |                       |
| T3/T4                                        | 39 (27.1)  | 17 (47.2) |                       |
| Lymph node metastasis (Negative vs Positive) |            |           | <b>0.0294</b>         |
| Negative                                     | 69 (47.9)  | 10 (27.8) |                       |
| Positive                                     | 75 (52.1)  | 26 (72.2) |                       |
| pStage (UICC) <sup>d</sup>                   |            |           | <b>0.0029</b>         |
| I/II                                         | 80 (55.6)  | 10 (27.8) |                       |
| III/IV                                       | 64 (44.4)  | 26 (72.2) |                       |

<sup>a</sup>Chi-square test or Fisher's exact test.

<sup>b</sup>Mean age.

<sup>c, d</sup>According to the Union for International Cancer Control (UICC) staging system.

Supplementary Table S2. Primary antibody with CODEX.

| Primary antibody | Catalog | Clone     | Flourophore      |
|------------------|---------|-----------|------------------|
| CD3e             | 4450030 | EP449E    | Cy5              |
| CD8              | 4250012 | C8/144B   | Atto550          |
| CD20             | 4450018 | L26       | Alexa Fluor™ 750 |
| Pan-Cytokeratin  | 4450020 | AE-1/AE-3 | Alexa Fluor™ 750 |
| Ki67             | 4250019 | B56       | Atto550          |
| CD107a           | 4350001 | H4A3      | Cy5              |

Supplementary Table S3. Univariate and multivariate analyses of RFS and OS between TLS presence and clinicopathological characteristics in ESCC patients.

|                                              | Univariate              |                      | Multivariate            |                      |
|----------------------------------------------|-------------------------|----------------------|-------------------------|----------------------|
|                                              | HR (95% CI)             | P value <sup>a</sup> | HR (95% CI)             | P value <sup>a</sup> |
| <b>RFS</b>                                   |                         |                      |                         |                      |
| Sex (male vs female)                         | 1.1 (0.51-2.5)          | 0.77                 | 1.0 (0.46-2.3)          | 0.94                 |
| Age (<63 <sup>b</sup> vs ≥63)                | 1.2 (0.72-2.1)          | 0.43                 | 1.1 (0.60-1.9)          | 0.84                 |
| T stage <sup>c</sup> (T1, 2 vs T3, 4)        | <b>0.44 (0.26-0.76)</b> | <b>0.003</b>         | 0.71 (0.39-1.3)         | 0.27                 |
| Lymph node metastasis (negative vs positive) | <b>0.32 (0.17-0.60)</b> | <b>0.0005</b>        | <b>0.40 (0.20-0.80)</b> | <b>0.0092</b>        |
| TLS (positive vs negative)                   | <b>0.35 (0.20-0.61)</b> | <b>0.0002</b>        | <b>0.42 (0.23-0.75)</b> | <b>0.0032</b>        |
| <b>OS</b>                                    |                         |                      |                         |                      |
| Sex (male vs female)                         | 1.3 (0.46-3.7)          | 0.62                 | 1.4 (0.48-4.0)          | 0.54                 |
| Age (<63 <sup>b</sup> vs ≥63)                | 1.0 (0.52-2.0)          | 0.97                 | 0.93 (0.47-1.9)         | 0.85                 |
| T stage <sup>c</sup> (T1, 2 vs T3, 4)        | 0.52 (0.27-1.0)         | 0.051                | 0.79 (0.38-1.6)         | 0.52                 |
| Lymph node metastasis (negative vs positive) | <b>0.39 (0.18-0.82)</b> | <b>0.013</b>         | 0.45 (0.20-1.0)         | 0.054                |
| TLS (positive vs negative)                   | <b>0.35 (0.17-0.69)</b> | <b>0.0027</b>        | <b>0.38 (0.19-0.78)</b> | <b>0.0079</b>        |

<sup>a</sup>Cox regression analysis.

<sup>b</sup>Mean age.

<sup>c</sup>According to the Union for International Cancer Control (UICC) staging system.

RFS, recurrence-free survival; OS, overall survival; HR, hazard ratio; CI, confidence interval; Bold; Significant *p* values.

Supplementary Table S4. Summary of patient characteristics used in scRNA-seq in this study.

| Sample ID                          | Age | Sex    | TNM (UICC) <sup>a</sup> | Stage (UICC) <sup>a</sup> | TLS      | Histology     |
|------------------------------------|-----|--------|-------------------------|---------------------------|----------|---------------|
| ESC06                              | 41  | Female | pT1aN0M0                | IA                        | negative | SCC           |
| ESC07                              | 52  | Male   | pT2N1M0                 | IIIA                      | negative | SCC           |
| ESC09                              | 80  | Female | ypT1bN0M0               | IB                        | positive | SCC           |
| ESC11                              | 70  | Female | ypT2N0M0                | IIA                       | positive | SCC           |
| ESC12                              | 61  | Male   | ypT3N2M0                | IIIB                      | negative | SCC           |
| ESC15                              | 71  | Male   | ypT3N3M0                | IVA                       | negative | SCC           |
| ESC16                              | 65  | Male   | ypT2N0M0                | IIA                       | negative | SCC           |
| ESC17                              | 62  | Male   | pT1aN2M0                | IIIA                      | positive | SCC           |
| ESC18                              | 74  | Female | pT1bN0M0                | IB                        | positive | SCC           |
| ESC22                              | 70  | Female | ypT4aN2M0               | IVA                       | positive | SCC           |
| ESN11 (derived from ESC11 patient) | 70  | Female | --                      | --                        |          | Normal tissue |
| ESN12 (derived from ESC12 patient) | 61  | Male   | --                      | --                        |          | Normal tissue |
| ESN13                              | 65  | Male   | --                      | --                        |          | Normal tissue |
| ESN15 (derived from ESC15 patient) | 71  | Male   | --                      | --                        |          | Normal tissue |

<sup>a</sup>According to the Union for International Cancer Control (UICC) staging system.

Supplementary Table S5. Components of each gene signature in our study.

| Gene set             | Source                  | Genes          |                |                 |                  |               |                 |                       |               |               |                  |             |                    |                 |               |                |                |                |                    |               |              |       |       |
|----------------------|-------------------------|----------------|----------------|-----------------|------------------|---------------|-----------------|-----------------------|---------------|---------------|------------------|-------------|--------------------|-----------------|---------------|----------------|----------------|----------------|--------------------|---------------|--------------|-------|-------|
| naive signature      | Sinjab A, et al. 2021   | CCR7           | IL7R           | LEF1            | SELL             | TCF1          |                 |                       |               |               |                  |             |                    |                 |               |                |                |                |                    |               |              |       |       |
| cytokine signature   | Chen B, et al. 2021     | CSF3           | IL1A           | IL1B            | IL1RN            | IL1R1         | IL1R2           | OSM                   | PTGS2         | TNF           | IL6              | IL11        | IL24               | LIF             | IL17C         | IL23A          | TNFSF15        | GSDMB          | GSDMD              | RELA          | RELB         | SOCS3 | CEBPB |
| GCB signature        | Wieland A, et al. 2021  | TCL1A          | CXCR5          | AICDA           | MME              |               |                 |                       |               |               |                  |             |                    |                 |               |                |                |                |                    |               |              |       |       |
| ASC signature        | Wieland A, et al. 2021  | CD38           | MZB1           | XBP1            | PRDM1            |               |                 |                       |               |               |                  |             |                    |                 |               |                |                |                |                    |               |              |       |       |
| DC activation        | Zhang Q, et al. 2019    | FSCN1<br>KIF2A | BIRC3<br>GRSF1 | LAMP3<br>FAM49A | CCL19<br>PLEKHG1 | LAD1<br>SOC2S | MARCKS<br>RFTN1 | TNFAIP2<br>AC009812.4 | CCR7<br>BMP2K | CCL22<br>NAV1 | MARCKSL1<br>IL7R | EBI3<br>ID2 | INFRSF11E<br>CCL17 | NUB1<br>PPP1R9B | INSM1<br>NRP2 | RAB9A<br>TUBB6 | LY75<br>ARNTL2 | SIAH2<br>UVRAG | POGLUT1<br>TXNDC11 | KDM2B<br>MREG | MGLL<br>BTG1 | TXN   | MLLT6 |
| DC migration         | Maier B, et al. 2020    | CCR7           | MYO1G          | CXCL16          | ADAM8            | ICAM1         | FSCN1           | MARCKS                |               |               |                  |             |                    |                 |               |                |                |                |                    |               |              |       |       |
| Antigen presentation | Hornburg M, et al. 2021 | HLA-A          | HLA-B          | HLA-C           | HLA-DQA1         | TAP1          | PSMB9           |                       |               |               |                  |             |                    |                 |               |                |                |                |                    |               |              |       |       |
